# Supplementary material
Source: Springer Nature journal article supplement (https://www.springermedizin.de/resource/supplementary/13017_2012_271_MOESM3_ESM.pdf/9635804)

# Survival Functions

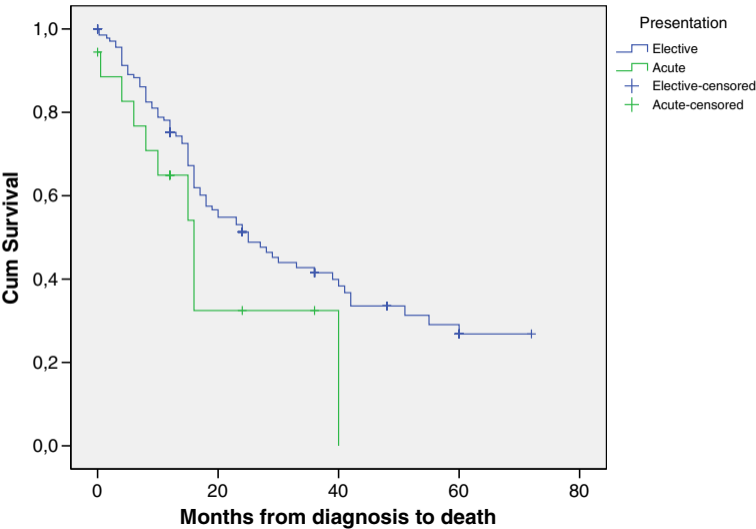

Supplement: MOESM3 [file 9635804]
